# Supplementary material
Source: PubMed Central journal article supplement (PMC3549569)
Supplement: NIHMS432968-supplement-01.pdf [file NIHMS432968-supplement-01.pdf]

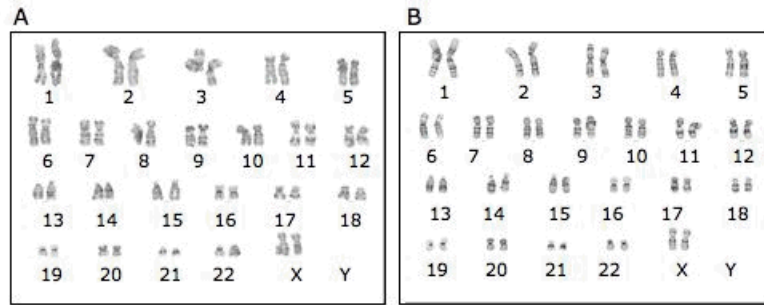

**S-Fig 1. Karyotype analysis of human iPS cells and derivative mesenchymal stem cells (MSC).** Cytogenetic analysis performed on twenty G-banded metaphase cells from human iPS cells cultured in a clinical compliant system at passage 10 (A) and iPS cell-derived MSCs at passage 12 (B), demonstrated an apparently normal female karyotype.

1

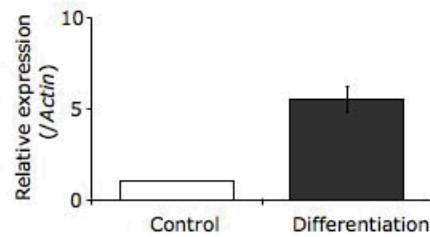

**S-Fig 2. In vitro differentiation of hiPS cell-derived mesenchymal stem cells (MSC) into adipogenic cells.** Adipogenic induction was detected by up-regulation of *peroxisome proliferator activated receptor gamma (PPAR-γ)*. Samples were analyzed by qRT-PCR, data normalized to human  $\beta$ -Actin expression and results shown are the mean and SEM of three experiments.

2

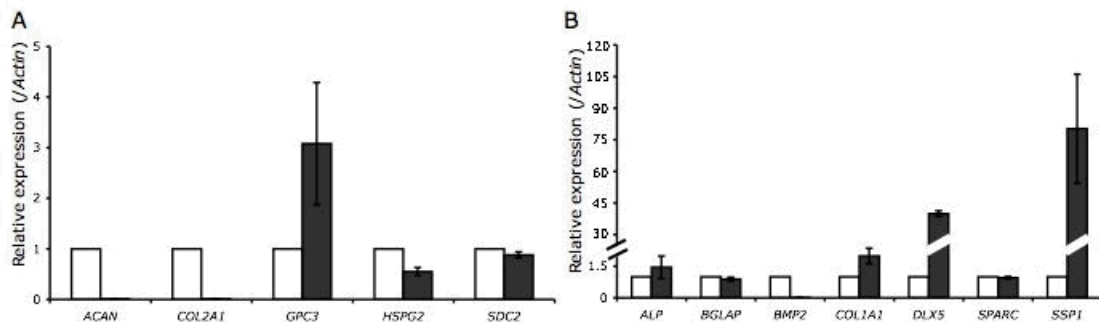

**S-Fig 3. Expression of chondrogenic and osteogenic related genes in *in vitro*-differentiated human IPS-MSCs.** Q-RT PCR was used to analyze the expression of genes-related to chondrogenic differentiation of human IPS-MSCs directed towards osteogenic differentiation (**A**), and osteogenic-related genes in cells induced to chondrogenesis (**B**). White columns show the control group: human IPS-MSCs cultured in growth-medium, while dark columns indicate cells induced to chondrogenic (**A**) and osteogenic (**B**) differentiation. *Aggrecan (ACAN)*, *collagen type II alpha-1 (COL2A1)*, *perlecan (HSPG2)*, *glypican 3 (GPC3)*, *syndecan 2 (SDC2)*, *bone morphogenetic protein 2 (BMP2)*, *collagen type I alpha-1 (COL1A1)*, *osteocalcin (BGLAP)*, *alkaline phosphatase (ALP)*, *bone sialoprotein 1 (SSP1)*, *osteonectin (SPARC)* and *distal-less homeobox 5 (DLX5)*. Data was normalized to human  $\beta$ -Actin expression and results shown are the mean and SEM of three experiments.
